# Supplementary material
Source: HighWire-hosted journal article supplement (https://jmg.bmj.com/content/55/5/322)
Supplement: inline-supplementary-material-3 [file inline-supplementary-material-3.docx]

**Supplementary table 3.** Univariate and multivariate analyses for comparison of overall survival of RA and CHB group.

| **Variables** | **Univariate analysis** | | |  | **Multivariate analysis1** | | |
| --- | --- | --- | --- | --- | --- | --- | --- |
| **HR** | **95% CI** | **P value** | **HR** | **95% CI** | **P value** |
| **First symptom**  ( RA vs. CHB) | 1.276 | 0.595-2.738 | 0.531 |  | 0.769 | 0.346-1.710 | 0.520 |

1 The other variables for multivariate analysis are sex, birth year, birth order, family history, mutation type and onset age.
